# Supplementary material for: Identification of key molecular biomarkers involved in reactive and neurodegenerative processes present in inherited congenital hydrocephalus
Source: Springer Nature journal article supplement (doi:10.1186/s12987-021-00263-2), 2021-07-02
Supplement: MOESM1 [file 19323580]

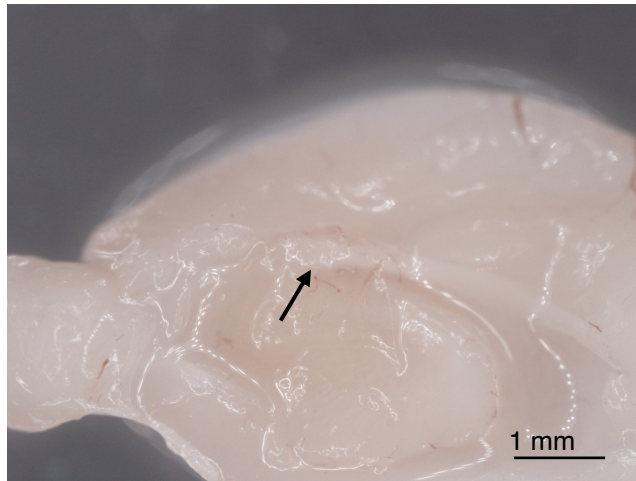

Additional file 1
