# Supplementary material for: Identification of key molecular biomarkers involved in reactive and neurodegenerative processes present in inherited congenital hydrocephalus
Source: Springer Nature journal article supplement (doi:10.1186/s12987-021-00263-2), 2021-07-02
Supplement: MOESM3 [file 19323580]

**Additional file 3. Overexpressed proteins as indicators of astrocyte reaction**

| Gene name | Sum PEP Score | Abundance Ratio:<br>(Sample) /<br>(Control) | Abundance Ratio<br>P-Value: (Sample)<br>/ (Control) |
|-----------|---------------|---------------------------------------------|-----------------------------------------------------|
| Gfap      | 330.9         | 4.775                                       | 2E-7                                                |
| Vim       | 442.3         | 2.383                                       | 0.003                                               |
